# Supplementary material for: On the formation of gold nanoparticles from [AuIIICl4]− and a non-classical reduced polyoxomolybdate as an electron source: a quantum mechanical modelling and experimental study
Source: Royal Society of Chemistry journal article supplement (doi:10.1039/c5nj02773j), 2016-01-01
Supplement: c5nj02773j1.pdf [file c5nj02773j1.pdf]

On the formation of gold nanoparticles from  $[\text{Au}^{\text{III}}\text{Cl}_4]^-$   
and a non-classical reduced polyoxomolybdate as  
electron source: quantum mechanical modelling and  
experimental study

**Zhongling Lang<sup>a</sup>, Isabel Maicas Gabas<sup>b</sup>, Xavier López<sup>a</sup>, Anna Clotet<sup>a</sup>, Jesús  
M. de la Fuente<sup>b,c,d</sup>, Scott G. Mitchell<sup>\*b</sup>, Josep M. Poblet<sup>\*a</sup>**

<sup>a</sup> Departament de Química Física i Inorgànica, Universitat Rovira i Virgili, c/Marcel·lí  
Domingo 1, 43007 Tarragona, Spain

<sup>b</sup> Instituto de Nanociencia de Aragón (INA), Universidad de Zaragoza, 50018 Zaragoza,  
Spain

<sup>c</sup> Instituto de Ciencia de Materiales de Aragón-CSIC/Universidad de Zaragoza

<sup>d</sup> Institute NanoBiomedicine and Engineering, Shanghai Jiao Tong University, Dongchuan  
Road 800, 200240 Shanghai, P. R. China.

**Supporting Information**

## Methods

### Experiments

**(NH<sub>4</sub>)<sub>15</sub>{Na[(Mo<sub>2</sub>O<sub>4</sub>)<sub>6</sub>(μ<sub>2</sub>-SO<sub>3</sub>)<sub>3</sub>(μ<sub>6</sub>-SO<sub>3</sub>)]<sub>2</sub>}·5H<sub>2</sub>O (Kabanos).** Kabanos POM was synthesized according to the literature.<sup>1</sup> Briefly, Na<sub>2</sub>Mo<sup>VI</sup>O<sub>4</sub>·2H<sub>2</sub>O (3.00 g, 12.6 mmol) was dissolved in HCl (37 %):H<sub>2</sub>O (1:4 v/v, 25 mL, pH~0) under magnetic stirring. Hydrazine monohydrate (0.320 g, 6.3 mmol) was then added, whereupon the light yellow color of the solution turned into dark-blue. Solid (NH<sub>4</sub>)<sub>2</sub>SO<sub>3</sub> (9.00 g, 67 mmol) was then added and the dark-blue color of the solution almost instantly became olive-green. The solution was kept in an open beaker for 2-3 days, over which time an abundance of thin red crystals were produced. These were filtered, washed with ethanol and air-dried. The yield obtained was *ca.* 97 % based on Mo (2.72 g). The FTIR spectrum at room temperature was dominated by bands at 1414 (NH<sub>4</sub><sup>+</sup>); 1073 (SO<sub>3</sub><sup>2-</sup>); 980 and 961 (Mo=O) from terminal oxygen atoms; 921, 890, 840 and 816 (SO<sub>3</sub><sup>2-</sup>); 718, 644 and 609 cm<sup>-1</sup> (Mo-O-Mo or Mo-O-S) from vibrations involving edge and corner sharing oxygen atoms. The UV-Vis spectrum (in H<sub>2</sub>O) was dominated by a broad absorption band from 200 to 600 nm.

---

1. M. J. Manos, J. D. Woollins, A. M. Z. Slawin and T. A. Kabanos, *Angew. Chem., Int. Ed.* 2002, **15**, 2801.

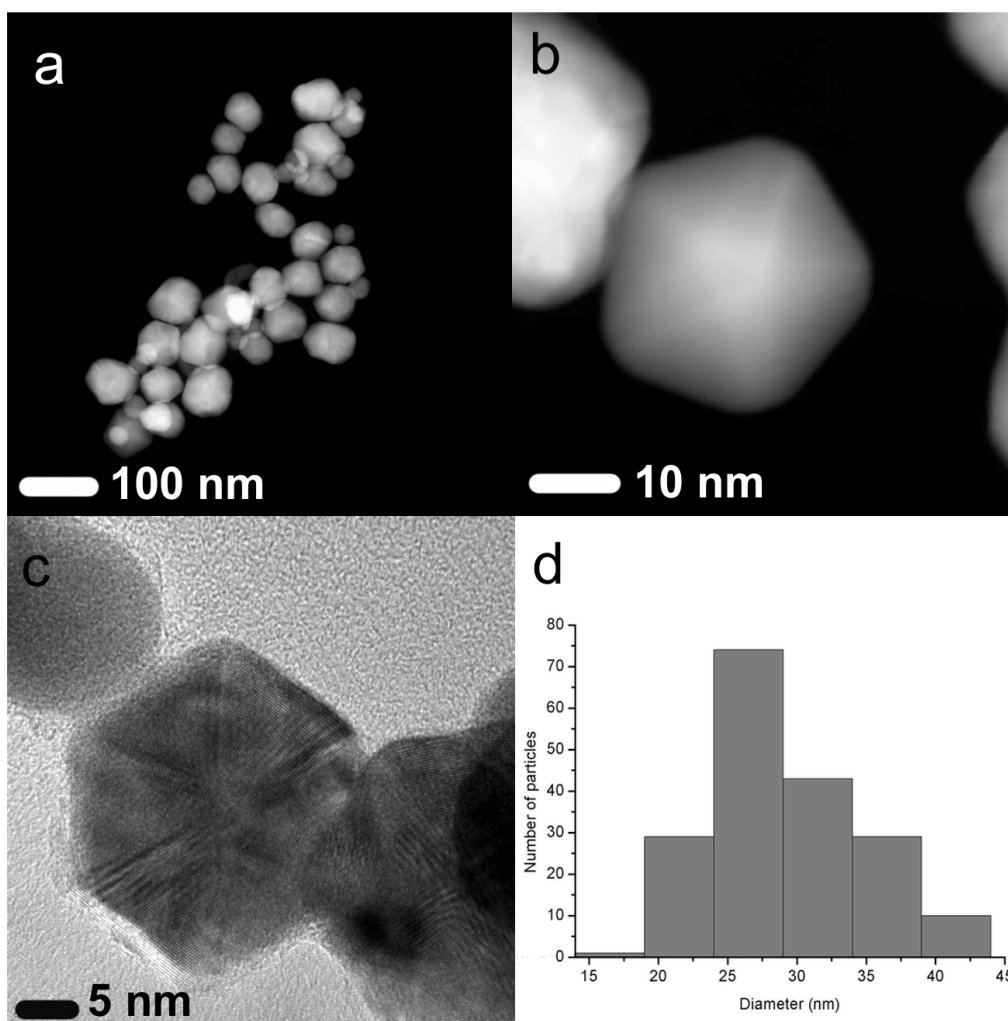

**Figure S1.** (a-b) STEM-HAADF and (c) HR-TEM images of AuNPs@POM and (d) size-dispersion histogram of the number of particles found for different diameter ranges.

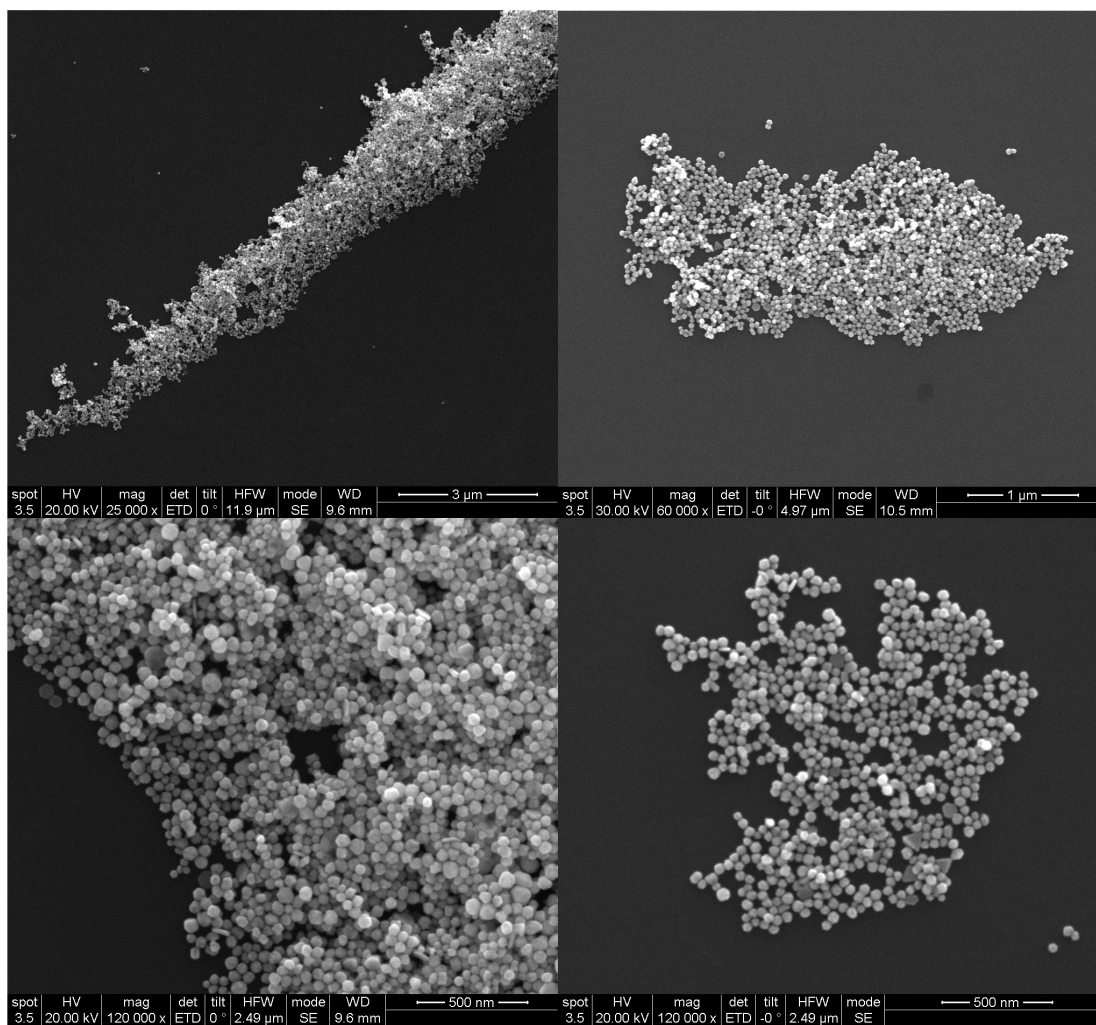

**Figure S2.** Scanning Electron Microscopy (SEM) images of polyhedral AuNPs@POM.

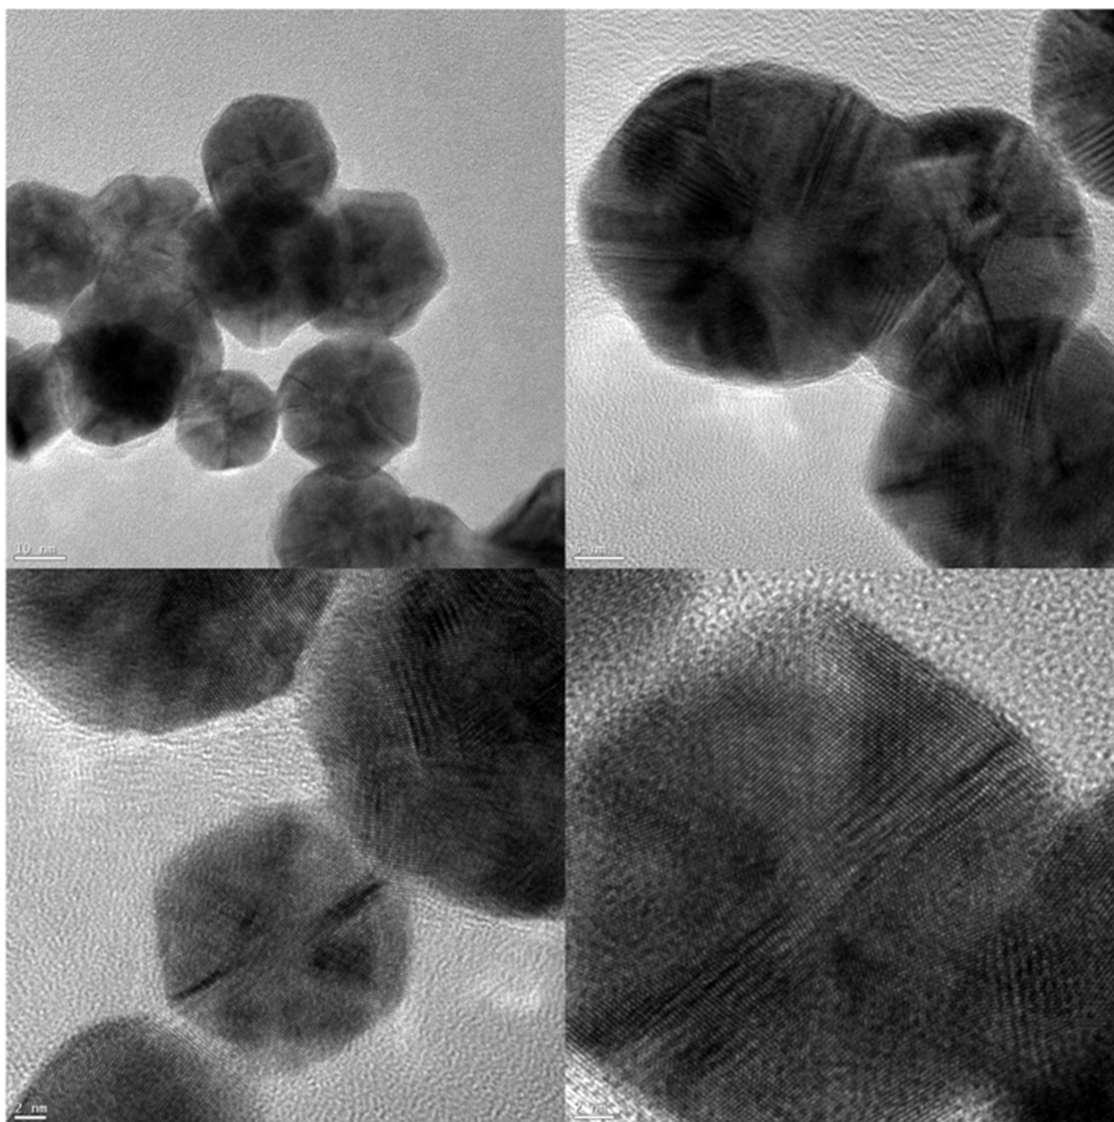

**Figure S3.** High-Resolution Transmission Electron Microscopy (HR-TEM) images of polyhedral AuNPs@POM.

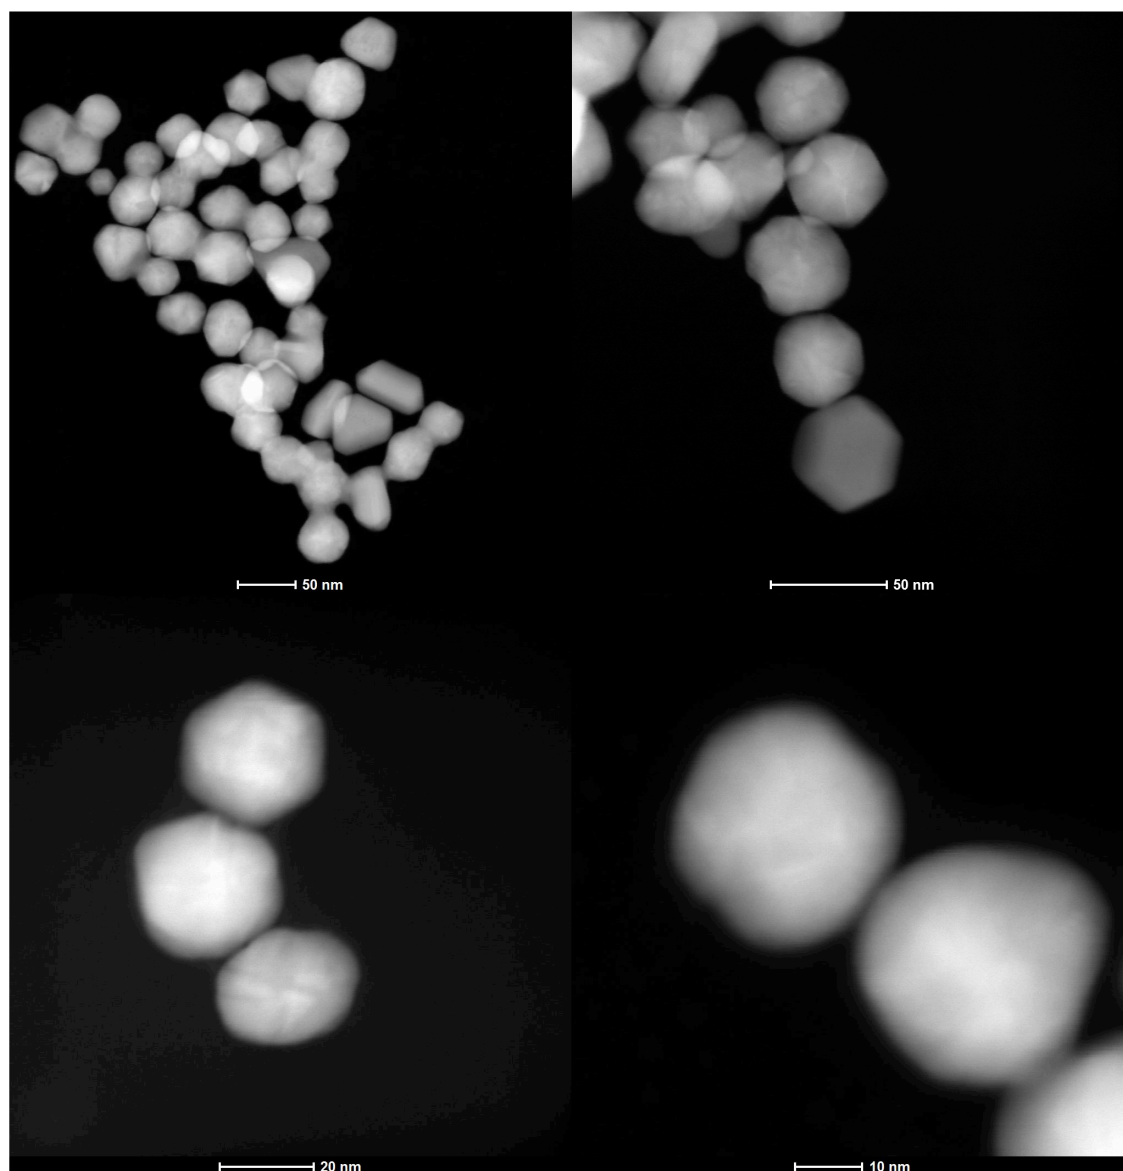

**Figure S4.** High-Angle Annular Dark Field Scanning Transmission Electron Microscopy (HAADF-STEM) images of polyhedral AuNPs@POM.

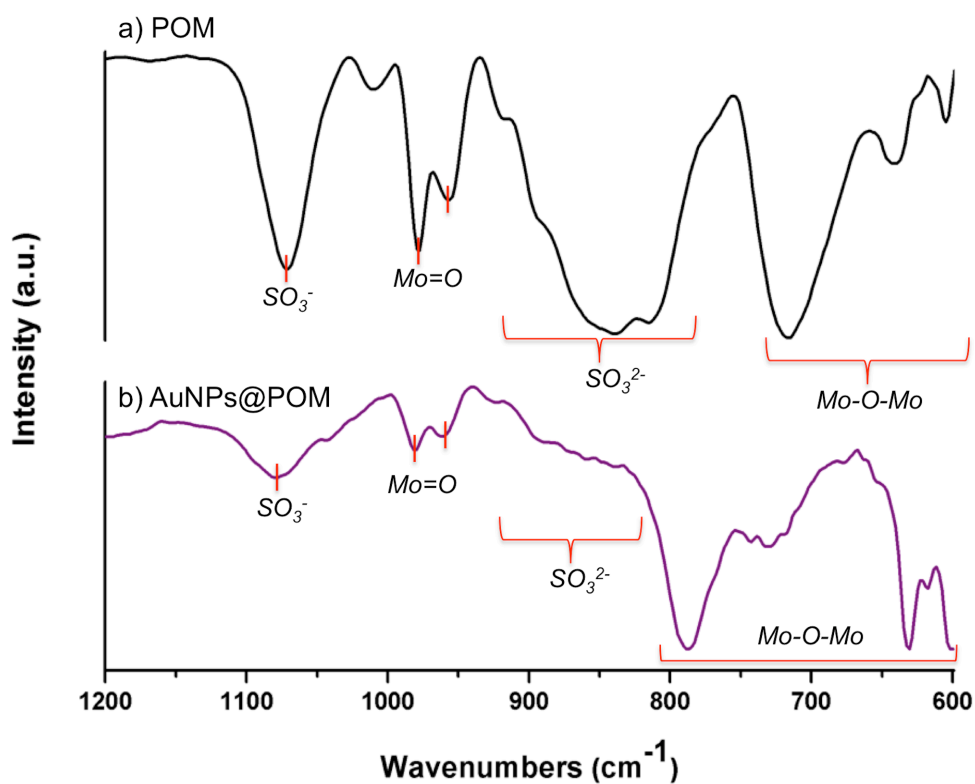

**Figure S5.** FTIR spectra of a) Kabanos POM single crystals and b) lyophilized AuNPs@POM. Both show prominent vibrational stretches for SO<sub>3</sub><sup>-</sup> and terminal Mo=O bonds, along with Mo-O-Mo stretches.

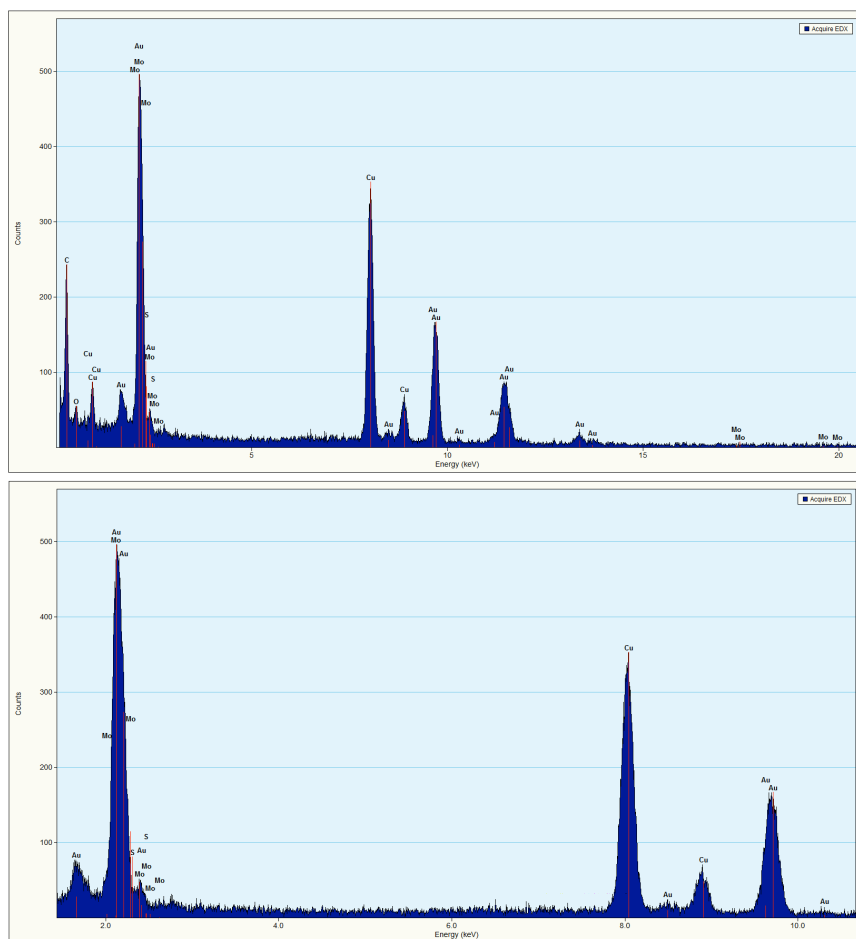

**Figure S6.** EDX spectra of AuNPs@POM showing the presence of Au and Mo. The Cu signal comes from TEM grid.

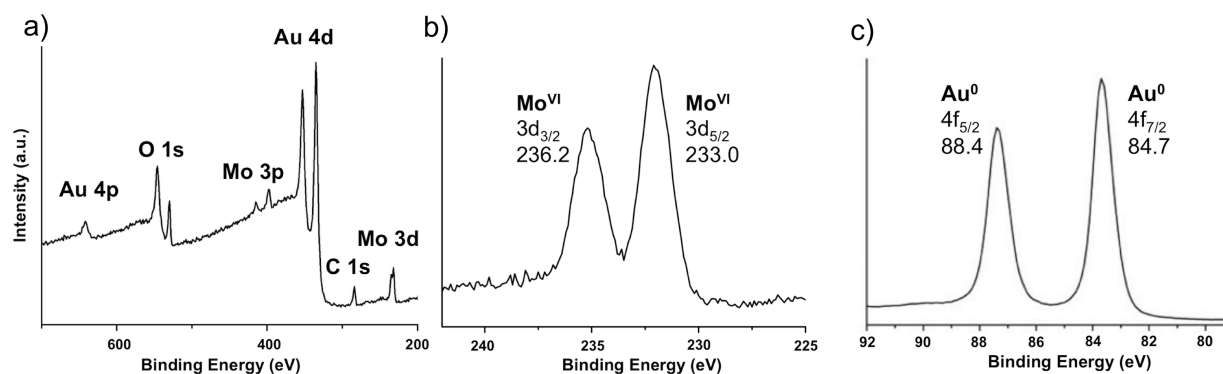

**Figure S7.** XPS spectra of AuNPs@POM showing a) general spectrum in the 200-700 eV range; b) the characteristic doublet for Mo<sup>VI</sup> in the 230-235 eV region; c) the spin-orbit doublet of Au<sup>0</sup> at 88.4 and 84.7 eV (splitting of 3.7 eV) for 4f<sub>5/2</sub> and 4f<sub>7/2</sub>, respectively. Note that there was no evidence of any Mo<sup>V</sup>.



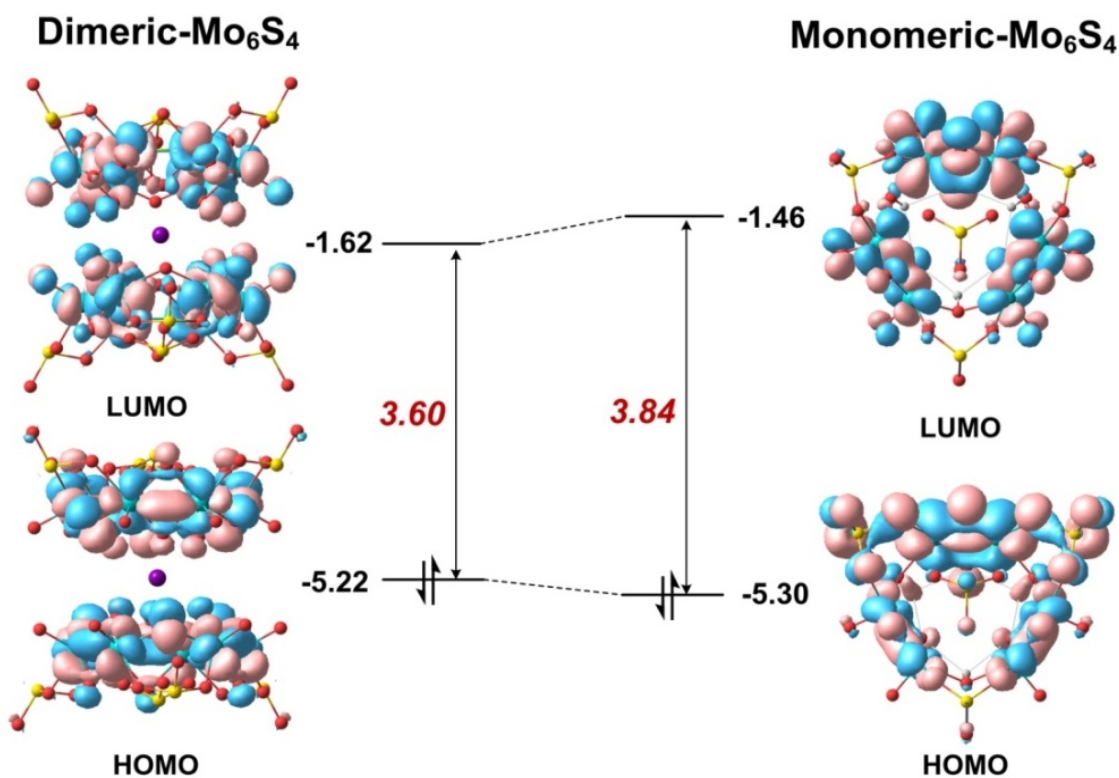

**Figure S8.** Energy (in eV) and composition of the highest occupied (HOMO) and lowest unoccupied (LUMO) molecular orbitals for {dimeric-H<sub>3</sub>S<sub>4</sub>Mo<sub>6</sub>} and {H<sub>3</sub>S<sub>4</sub>Mo<sub>6</sub>}. The HOMO-LUMO (H-L) gaps are 3.60 and 3.84 eV for the dimer and monomer structures, that is, the latter is only 0.24 eV (*ca.* 6%) larger. The three highest occupied orbitals (six for the dimer) have significant contributions from the Mo<sup>V</sup><sub>2</sub>O<sub>4</sub> core and have Mo-Mo bonding character, where each couple of electrons occupying them are provided by two Mo<sup>V</sup>.

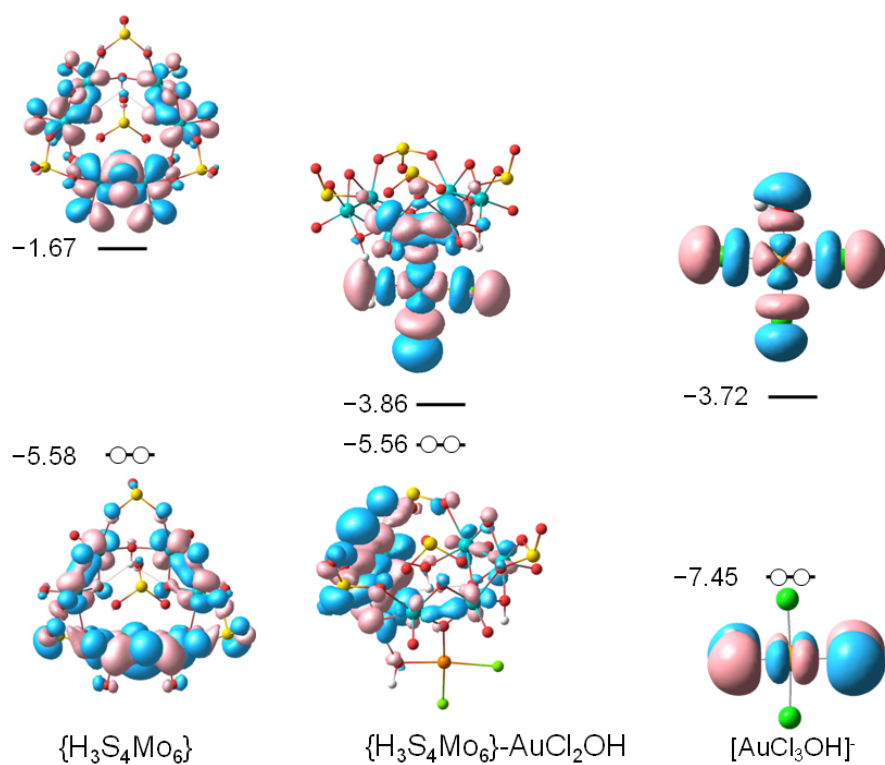

**Figure S9.** Schematic view of the frontier molecular orbitals of the  $\{H_3S_4Mo_6\}-AuCl_3$  adduct (A-1), compared with the independent  $\{H_3S_4Mo_6\}$  and  $[AuCl_3OH]^-$  units at B3LYP-D3(BJ)/6-311++G(d,p),def2-TZVPP level. The HOMO of the adduct resembles in energy and shape to that of  $\{H_3S_4Mo_6\}$ , whereas the LUMO is  $[AuCl_3OH]^-$ -like. Even though, there is some mixing of the orbitals leading to stabilization of the HOMO and destabilization of the LUMO.

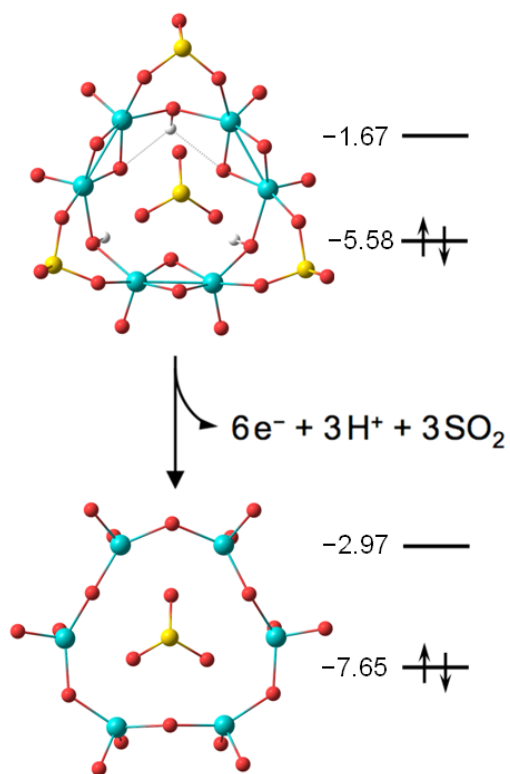

**Figure S10.** Evolution from the initial POM structure,  $[(Mo_2^V O_4)_3(\mu_2-OH)_3(\mu_2-SO_3)_3(\mu_6-SO_3)]^{5-}$ , to the proposed final one,  $[SMo^{VI}_6O_{21}]^{2-}$ , with the associated loss of electrons, protons and  $SO_2$ . Indicated are the corresponding HOMO and LUMO energies, in eV.

Optimized coordinates (xyz) for the  $\{\text{H}_3\text{S}_4\text{Mo}_6\}^{5-}$ ,  $\{\text{H}_2\text{S}_4\text{Mo}_6\}^{4-}$ ,  $\{\text{HS}_4\text{Mo}_6\}^{3-}$ , **A**, **B**, **C-1**, **C-2**, **D-1**, and **D-2** species as described in the manuscript which have been obtained in our work at B3LYP-D3(BJ)/6-311++G(d,p),def2-TZVPP level.

$\{\text{H}_3\text{S}_4\text{Mo}_6\}^{5-}$

40

|    |             |             |             |
|----|-------------|-------------|-------------|
| Mo | 0.33296573  | 0.32194773  | 3.10661442  |
| O  | 1.11074463  | 0.73098958  | 4.55452751  |
| Mo | 0.27955905  | 2.54830596  | 1.82349876  |
| O  | 1.03568349  | 3.62764128  | 2.88550035  |
| Mo | 0.41969048  | -2.84574644 | 1.28413326  |
| O  | 1.24807671  | -4.27180768 | 1.66890757  |
| O  | 1.49464209  | 1.04208071  | 1.73817581  |
| O  | -1.09862753 | 1.59683257  | 2.81402914  |
| O  | 1.57496749  | -1.97254048 | 0.00000000  |
| O  | -0.97047033 | -3.28294051 | 0.00000000  |
| S  | -1.33907562 | -0.04089164 | 0.00000000  |
| O  | -0.66109161 | -0.73196485 | 1.23364446  |
| O  | -0.73468270 | 1.40120473  | 0.00000000  |
| S  | -1.02781197 | -2.47732636 | 4.23887434  |
| O  | -1.10994293 | -0.89598440 | 3.97646010  |
| O  | -1.04802231 | -3.05167153 | 2.73886322  |
| S  | -1.48401991 | 4.80611372  | 0.00000000  |
| O  | -1.24656591 | 3.83887137  | 1.24852016  |
| O  | -2.37556504 | -2.84028004 | 4.80295241  |
| O  | -0.38027735 | 5.83621386  | 0.00000000  |
| O  | 1.34890191  | -1.50354285 | 2.65875531  |
| O  | 1.24587639  | 3.05259865  | 0.00000000  |
| O  | -0.66109161 | -0.73196485 | -1.23364446 |
| O  | -1.24656591 | 3.83887137  | -1.24852016 |
| Mo | 0.33296573  | 0.32194773  | -3.10661442 |
| O  | 1.11074463  | 0.73098958  | -4.55452751 |
| Mo | 0.27955905  | 2.54830596  | -1.82349876 |
| O  | 1.03568349  | 3.62764128  | -2.88550035 |
| Mo | 0.41969048  | -2.84574644 | -1.28413326 |
| O  | 1.24807671  | -4.27180768 | -1.66890757 |
| O  | 1.49464209  | 1.04208071  | -1.73817581 |
| O  | -1.09862753 | 1.59683257  | -2.81402914 |
| S  | -1.02781197 | -2.47732636 | -4.23887434 |
| O  | -1.10994293 | -0.89598440 | -3.97646010 |
| O  | -1.04802231 | -3.05167153 | -2.73886322 |
| O  | -2.37556504 | -2.84028004 | -4.80295241 |
| O  | 1.34890191  | -1.50354285 | -2.65875531 |
| H  | 2.14359914  | -1.21122269 | 2.19127377  |
| H  | 2.14359914  | -1.21122269 | -2.19127377 |
| H  | 2.01114290  | 2.45981906  | 0.00000000  |

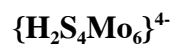

39

|    |             |             |             |
|----|-------------|-------------|-------------|
| Mo | -2.74571400 | 1.70107300  | -0.07022600 |
| O  | -4.26685800 | 2.28372300  | -0.52163200 |
| Mo | -3.04238700 | -0.84852400 | -0.13690000 |
| O  | -4.63161000 | -1.03475200 | -0.67651000 |
| Mo | 0.51133700  | 3.02781600  | -0.97444200 |
| O  | 0.95631200  | 4.51280200  | -1.67929600 |
| O  | -2.27942000 | 0.39203500  | -1.41354700 |
| O  | -3.00728900 | 0.40781500  | 1.34454600  |
| O  | 0.54645000  | 1.98091000  | -2.32464500 |
| O  | 2.13876700  | 2.48792200  | -0.09311900 |
| S  | 0.13407500  | 0.13742000  | 1.18779400  |
| O  | -0.38045700 | 1.32027300  | 0.29411300  |
| O  | -0.72167500 | -1.07004000 | 0.70671400  |
| S  | -1.53757200 | 4.41200800  | 1.40577800  |
| O  | -2.32445000 | 3.00723800  | 1.46444200  |
| O  | -0.14058300 | 3.97868200  | 0.75724400  |
| S  | -2.83115900 | -3.88422300 | 1.29458800  |
| O  | -3.16909800 | -2.32635600 | 1.31646300  |
| O  | -1.22688900 | 4.72913100  | 2.84097400  |
| O  | -3.56724800 | -4.51201400 | 0.13887400  |
| O  | -1.59140100 | 3.06180400  | -1.26659400 |
| O  | -1.91087900 | -2.19608900 | -1.32154500 |
| O  | 1.57815100  | -0.17554600 | 0.63301300  |
| O  | -1.27057100 | -3.86663000 | 0.93048200  |
| Mo | 2.23034200  | -2.02300800 | -0.49929000 |
| O  | 3.18728200  | -3.11514800 | -1.36657500 |
| Mo | -0.12345200 | -3.02258100 | -0.55044800 |
| O  | 0.05668100  | -4.40069800 | -1.50754000 |
| Mo | 3.48932800  | 1.21019700  | -0.22081500 |
| O  | 4.76651200  | 2.05328000  | -0.96410000 |
| O  | 0.74419500  | -1.60970300 | -1.61887200 |
| O  | 1.28108400  | -3.05169100 | 0.79720600  |
| S  | 4.10788000  | -1.04163200 | 2.30250000  |
| O  | 3.79557400  | -1.87265900 | 1.07901600  |
| O  | 4.13076200  | 0.76980200  | 1.40043400  |
| O  | 2.98420200  | -0.91205100 | 3.23538400  |
| O  | 3.34410600  | -0.29819700 | -1.16040500 |
| H  | -1.73633100 | 2.78013900  | -2.17914300 |
| H  | -1.62319300 | -1.62932300 | -2.05259500 |

**{HS<sub>4</sub>Mo<sub>6</sub>}<sup>-</sup>**

38

|    |             |             |             |
|----|-------------|-------------|-------------|
| Mo | -2.83389500 | 2.40035700  | -0.86478000 |
| O  | -3.85818800 | 3.33187800  | -1.86471400 |
| Mo | -3.81417900 | -0.98844900 | -0.09309400 |
| O  | -4.88069400 | -1.72164100 | -1.18270400 |
| Mo | 0.79624000  | 2.91623000  | -0.72963500 |
| O  | 0.73964000  | 4.48231600  | -0.07853300 |
| O  | -3.22121900 | 0.60821100  | -1.11947600 |
| O  | -4.78774200 | -0.08631500 | 0.97655100  |
| O  | 1.39144700  | 3.05190900  | -2.32508200 |
| O  | 2.54578600  | 2.40812500  | 0.04271800  |
| S  | 0.74387000  | 0.32080200  | 1.49523100  |
| O  | 0.14306300  | 1.42514000  | 0.47046900  |
| O  | -0.22035600 | -0.82907300 | 1.39935600  |
| S  | -2.22942400 | 2.86884100  | 3.11386200  |
| O  | -3.16076900 | 2.83012400  | 0.77277300  |
| O  | -1.20706700 | 3.89978400  | 2.91430700  |
| S  | -2.73933900 | -3.93845000 | 1.14510200  |
| O  | -3.37796100 | -2.39306100 | 1.15855200  |
| O  | -1.73583900 | 1.49559600  | 3.23544700  |
| O  | -3.28577000 | -4.59310700 | -0.07733500 |
| O  | -1.10674000 | 2.81847600  | -1.29339600 |
| O  | -1.88451600 | -1.53675400 | -0.92844200 |
| O  | 2.06150600  | -0.16483100 | 0.73942500  |
| O  | -1.21822100 | -3.60777900 | 0.92783900  |
| Mo | 2.27445100  | -1.86436400 | -0.68585700 |
| O  | 2.96638400  | -2.83161500 | -1.88767600 |
| Mo | -0.15169300 | -2.64720500 | -0.59638500 |
| O  | -0.21703500 | -3.84192100 | -1.77534200 |
| Mo | 3.85857600  | 1.14045500  | -0.20938500 |
| O  | 5.10623100  | 2.03402700  | -0.94205200 |
| O  | 0.68136900  | -1.10638400 | -1.44846600 |
| O  | 1.38722300  | -3.02824800 | 0.53604000  |
| S  | 4.62235200  | -1.41371900 | 1.83897300  |
| O  | 4.01722400  | -2.08784100 | 0.60054200  |
| O  | 4.69978600  | 0.33619000  | 1.23134000  |
| O  | 3.67489100  | -1.35032300 | 2.96711600  |
| O  | 3.47636000  | -0.14575300 | -1.36222100 |
| H  | -1.62871900 | -0.77160100 | -1.46326300 |

## A

46

|    |             |             |             |
|----|-------------|-------------|-------------|
| Mo | -2.10167800 | -1.73427000 | -1.24790900 |
| O  | -3.65237600 | -2.33402600 | -0.92249600 |
| Mo | -2.49277300 | 0.79652100  | -1.47052400 |
| O  | -4.15891200 | 0.95225800  | -1.19871800 |
| Mo | 1.09760200  | -3.01885100 | -0.12209300 |
| O  | 1.42842900  | -4.36455800 | 0.85170100  |
| O  | -1.85066400 | -0.27647900 | -0.00376600 |
| O  | -2.22952000 | -0.58651700 | -2.80726400 |
| O  | 1.14792600  | -1.53998800 | 1.13327100  |
| O  | 2.75239600  | -2.52636800 | -1.02281400 |
| S  | 0.91130400  | -0.05205800 | -2.04863900 |
| O  | 0.21224000  | -1.36409500 | -1.55158900 |
| O  | -0.14918100 | 1.06913900  | -1.80564000 |
| S  | -0.81923200 | -4.60625700 | -2.29747800 |
| O  | -1.56806200 | -3.22470100 | -2.60975600 |
| O  | 0.63452300  | -4.09349900 | -1.83606000 |
| S  | -1.97209400 | 3.66125900  | -3.23275200 |
| O  | -2.38970600 | 2.12946700  | -3.07407800 |
| O  | -0.58495600 | -5.22655200 | -3.65123300 |
| O  | -2.94186900 | 4.49463700  | -2.42771200 |
| O  | -1.00491500 | -2.90537700 | 0.13998900  |
| O  | -1.79791100 | 2.40507900  | -0.27885000 |
| O  | 2.00716700  | 0.21259800  | -0.95997300 |
| O  | -0.55065400 | 3.72458800  | -2.50513500 |
| Mo | 2.40783200  | 2.23016200  | 0.21579300  |
| O  | 2.95230600  | 3.46857600  | 1.23790400  |
| Mo | 0.15819700  | 3.13102100  | -0.63945700 |
| O  | 0.04113500  | 4.64949300  | 0.10404700  |
| Mo | 2.97358300  | -1.36659000 | 0.52114300  |
| O  | 3.85596700  | -2.22017600 | 1.68770400  |
| O  | 0.59310300  | 1.91850000  | 0.78820800  |
| O  | 1.90638000  | 3.01362300  | -1.48875400 |
| S  | 5.37117500  | 0.80795400  | -0.16295000 |
| O  | 4.26273900  | 1.85491400  | -0.65932300 |
| O  | 4.63912300  | -0.59084500 | -0.45760200 |
| O  | 6.46594700  | 0.89178100  | -1.19465800 |
| O  | 2.83762800  | 0.54171800  | 1.45452600  |
| H  | -1.16809900 | -2.54744900 | 1.04425000  |
| H  | 2.06543000  | 0.47770800  | 2.04278100  |
| H  | -1.77759000 | 2.06797300  | 0.62995200  |
| Au | -1.69583100 | -0.12450900 | 2.97237300  |
| Cl | -2.55550600 | 2.06401500  | 3.12246200  |
| Cl | 0.39716100  | 0.56065800  | 3.79836100  |
| Cl | -3.84019800 | -0.96562400 | 2.52919200  |
| O  | -0.95596800 | -1.96821900 | 2.74152500  |
| H  | -0.04689000 | -1.77572300 | 2.42475300  |

**B**

45

|    |             |             |             |
|----|-------------|-------------|-------------|
| Mo | 0.82928100  | 3.08447400  | -0.26360700 |
| O  | 1.04867900  | 4.54224000  | 0.56816700  |
| Mo | 2.88292800  | 1.68897600  | 0.40478900  |
| O  | 3.72987100  | 2.71316700  | 1.45090600  |
| Mo | -2.27819600 | 1.42157300  | -1.05534600 |
| O  | -3.87494100 | 1.83810700  | -0.71609900 |
| O  | 1.06626100  | 1.71113100  | 1.08324200  |
| O  | 2.46168900  | 2.68114700  | -1.21546900 |
| O  | -1.98629000 | 0.08032400  | 0.41717300  |
| O  | -2.41844400 | 0.09580300  | -2.45658400 |
| S  | 0.78238200  | -0.03826000 | -1.91766600 |
| O  | -0.02448300 | 1.21128400  | -1.40382000 |
| O  | 2.00664800  | -0.10194400 | -0.96668400 |
| S  | -1.33522900 | 4.22367900  | -2.50120400 |
| O  | 0.17448100  | 3.90237500  | -2.07007800 |
| O  | -1.97958600 | 2.72943900  | -2.59080400 |
| S  | 5.47466700  | -0.27652000 | -0.55911500 |
| O  | 4.54123600  | 1.01624400  | -0.64817900 |
| O  | -1.23986900 | 4.65497100  | -3.93688600 |
| O  | 6.07198100  | -0.32306700 | 0.82652300  |
| O  | -1.25922300 | 2.87744300  | 0.03537600  |
| O  | 2.92833300  | -0.14747400 | 1.45631100  |
| O  | -0.13419100 | -1.22365700 | -1.45857100 |
| O  | 4.42027100  | -1.46988200 | -0.67727700 |
| Mo | 0.51344800  | -3.15600800 | -0.27258100 |
| O  | 0.59468300  | -4.61606500 | 0.58163200  |
| Mo | 2.70088400  | -1.96981300 | 0.37666300  |
| O  | 3.44226400  | -3.06121700 | 1.43748400  |
| Mo | -2.42715500 | -1.22618000 | -1.03805900 |
| O  | -4.06176900 | -1.45391700 | -0.69625200 |
| O  | 0.89523300  | -1.78806100 | 1.03872100  |
| O  | 2.17933500  | -2.92465900 | -1.23476400 |
| S  | -1.76967500 | -4.12714700 | -2.44985700 |
| O  | -0.22759100 | -3.93893500 | -2.06188000 |
| O  | -2.27063100 | -2.57954500 | -2.54835100 |
| O  | -1.75500600 | -4.58727800 | -3.87959300 |
| O  | -1.52979000 | -2.72287500 | 0.06026300  |
| H  | -1.49413200 | 2.79467800  | 0.97822400  |
| H  | -1.64701900 | -2.49831800 | 1.03160200  |
| H  | 2.10262400  | -0.11538600 | 1.96218000  |
| Au | -2.05695600 | 0.01278600  | 2.48846400  |
| Cl | -2.50398700 | 2.31077800  | 2.69274600  |
| Cl | -2.21110000 | -0.16656700 | 4.82041700  |
| O  | -1.76999600 | -1.97860200 | 2.47238700  |
| H  | -2.42201500 | -2.34183300 | 3.08482700  |



**C-1**

45

|    |             |             |             |
|----|-------------|-------------|-------------|
| Mo | 0.07396300  | 3.15762100  | -0.21245400 |
| O  | -0.19880100 | 4.59382300  | 0.63664500  |
| Mo | 2.34609000  | 2.37010600  | 0.66237200  |
| O  | 2.75667900  | 3.55884500  | 1.79103200  |
| Mo | -2.49319300 | 0.90106200  | -1.42045200 |
| O  | -4.16017400 | 0.96320000  | -1.13240000 |
| O  | 0.52654800  | 1.86224800  | 1.13223100  |
| O  | 1.83444700  | 3.25138100  | -0.99197500 |
| O  | -1.97870800 | -0.31787000 | -0.03618400 |
| O  | -2.22394500 | -0.51228800 | -2.55881500 |
| S  | 0.97997200  | 0.17101600  | -1.86058600 |
| O  | -0.15471000 | 1.22207800  | -1.54375000 |
| O  | 2.06189200  | 0.43628600  | -0.78047700 |
| S  | -2.00255500 | 3.96286300  | -2.69215300 |
| O  | -0.55553100 | 3.92924100  | -2.09781500 |
| O  | -2.35539600 | 2.30611700  | -2.72763800 |
| S  | 5.44168400  | 1.19623300  | -0.03719200 |
| O  | 4.20676700  | 2.19766000  | -0.21765800 |
| O  | -1.87213500 | 4.31752500  | -4.13275400 |
| O  | 5.89132300  | 1.26967500  | 1.40016400  |
| O  | -1.92070500 | 2.42533900  | -0.12968200 |
| O  | 2.79129000  | 0.60326000  | 1.72417900  |
| O  | 0.34652300  | -1.20558500 | -1.44130200 |
| O  | 4.75231100  | -0.22613400 | -0.26607900 |
| Mo | 1.44086000  | -2.92360300 | -0.12225200 |
| O  | 1.86382700  | -4.30905500 | 0.74982500  |
| Mo | 3.16664100  | -1.19220500 | 0.65901800  |
| O  | 4.09536500  | -2.05242000 | 1.78043500  |
| Mo | -1.80111500 | -2.00485000 | -1.22624400 |
| O  | -3.30006200 | -2.69000500 | -0.89387700 |
| O  | 1.33502500  | -1.51118100 | 1.18650300  |
| O  | 3.03775300  | -2.23057200 | -0.97432400 |
| S  | -0.19744700 | -4.53537900 | -2.52355000 |
| O  | 1.13267900  | -3.86781900 | -1.96808100 |
| O  | -1.17519700 | -3.21216400 | -2.67777100 |
| O  | 0.10494200  | -4.91675800 | -3.93957300 |
| O  | -0.65013700 | -3.04306300 | 0.05802600  |
| H  | -2.27736800 | 2.28707500  | 0.77375400  |
| H  | -0.98443800 | -2.81400700 | 1.03095200  |
| H  | 1.94894600  | 0.39808000  | 2.15739700  |
| Au | -2.38974800 | -0.49236800 | 2.29977100  |
| Cl | -3.35187100 | 1.71050200  | 2.43960800  |
| Cl | -2.98319500 | -0.96793300 | 4.70419900  |
| O  | -1.50001000 | -2.37650000 | 2.26371600  |
| H  | -2.07856300 | -2.97708200 | 2.74665400  |

**C-2**

45

|    |             |             |             |
|----|-------------|-------------|-------------|
| Mo | 1.69347800  | 2.83102000  | -0.02535400 |
| O  | 2.18401300  | 4.16063200  | 0.93499600  |
| Mo | 3.33772200  | 0.94375400  | 0.68133000  |
| O  | 4.36100500  | 1.68564900  | 1.83361600  |
| Mo | -1.69354700 | 2.03450400  | -1.18667300 |
| O  | -3.19071100 | 2.82701900  | -0.97200300 |
| O  | 1.53266000  | 1.36694900  | 1.26510500  |
| O  | 3.27737900  | 2.09605700  | -0.89831000 |
| O  | -1.86753000 | 0.57351400  | 0.17771300  |
| O  | -1.95867700 | 0.85718600  | -2.73269100 |
| S  | 1.04206000  | -0.18091900 | -1.82695800 |
| O  | 0.55322300  | 1.24707700  | -1.39057200 |
| O  | 2.10356600  | -0.58543700 | -0.75576600 |
| S  | 0.02739700  | 4.63996300  | -2.18329500 |
| O  | 1.40795200  | 3.91290900  | -1.78542100 |
| O  | -0.90544500 | 3.34960700  | -2.54043100 |
| S  | 5.43272300  | -1.57290500 | -0.24693100 |
| O  | 4.84657500  | -0.09620900 | -0.36296100 |
| O  | 0.29338600  | 5.27449200  | -3.51458300 |
| O  | 5.87783100  | -1.81024000 | 1.16642700  |
| O  | -0.44068400 | 3.05945800  | 0.17001800  |
| O  | 2.87788000  | -0.88973400 | 1.70742400  |
| O  | -0.19609800 | -1.08999400 | -1.51053000 |
| O  | 4.11064400  | -2.50511400 | -0.49818700 |
| Mo | -0.47898600 | -3.18029500 | -0.25568300 |
| O  | -0.91348000 | -4.64127800 | 0.54072000  |
| Mo | 2.38278900  | -2.59583000 | 0.56656600  |
| O  | 2.80748400  | -3.83702700 | 1.65967000  |
| Mo | -2.42291200 | -0.49971300 | -1.41931000 |
| O  | -4.12929800 | -0.43076600 | -1.24649400 |
| O  | 0.44562000  | -2.24634100 | 1.09341300  |
| O  | 1.36507000  | -3.46291600 | -0.86977600 |
| S  | -2.41643400 | -3.43371900 | -2.84425700 |
| O  | -0.95133400 | -3.74534200 | -2.17657000 |
| O  | -2.38601900 | -1.82797700 | -3.01704400 |
| O  | -2.31002900 | -3.96624700 | -4.23718900 |
| O  | -2.09086000 | -2.22457400 | -0.27486400 |
| H  | -0.69297800 | 2.80144500  | 1.08215700  |
| H  | -3.15778500 | -1.95383600 | 0.95872700  |
| H  | 2.05292100  | -0.65786700 | 2.16758400  |
| Au | -2.52077500 | 0.33195300  | 2.28580800  |
| Cl | -1.51913400 | 2.48518100  | 3.07009000  |
| Cl | -3.28414300 | -0.22265900 | 4.58369600  |
| O  | -3.79498100 | -1.48122300 | 1.56209900  |
| H  | -4.42915500 | -1.08119500 | 0.94217200  |

**D-1**

45

|    |             |             |             |
|----|-------------|-------------|-------------|
| Mo | -2.42398500 | -0.73146000 | -1.69267700 |
| O  | -4.11112700 | -0.80492200 | -1.79024300 |
| Mo | -1.94236200 | 1.78107700  | -1.43830700 |
| O  | -3.48734100 | 2.46527900  | -1.39887000 |
| Mo | -0.25144800 | -3.06381500 | 0.03497000  |
| O  | -0.54357900 | -4.63828400 | 0.61506600  |
| O  | -2.03930400 | 0.35231000  | -0.14397100 |
| O  | -1.80754200 | 0.58799600  | -2.96425200 |
| O  | -0.32286200 | -2.14288300 | 1.47010900  |
| O  | 1.67477200  | -3.05697900 | -0.22523900 |
| S  | 1.04992100  | -0.18244100 | -1.75304400 |
| O  | -0.07298400 | -1.12679500 | -1.21205300 |
| O  | 0.48657200  | 1.23792400  | -1.45854100 |
| S  | -1.62900100 | -3.66122000 | -3.04090600 |
| O  | -1.91181000 | -2.07573000 | -3.16499400 |
| O  | -0.45215400 | -3.70907000 | -1.96767000 |
| S  | -0.33900200 | 4.57123000  | -2.45807900 |
| O  | -1.12789300 | 3.21135600  | -2.71286300 |
| O  | -0.99068200 | -4.02498300 | -4.35456500 |
| O  | -1.18373100 | 5.45654300  | -1.57758100 |
| O  | -2.19196900 | -2.43139400 | -0.40083500 |
| O  | -0.92668300 | 2.76705700  | 0.13008700  |
| O  | 2.24674000  | -0.34877900 | -0.72655100 |
| O  | 0.91231100  | 4.05999500  | -1.59330500 |
| Mo | 2.98055700  | 1.22894500  | 0.73037800  |
| O  | 3.89092000  | 1.99487500  | 1.93261300  |
| Mo | 1.16573000  | 2.91812200  | 0.09215400  |
| O  | 1.43710900  | 4.18542100  | 1.17280800  |
| Mo | 3.09099200  | -2.24621800 | 0.69055900  |
| O  | 3.48855700  | -3.41235700 | 1.86354500  |
| O  | 1.15628200  | 1.33219000  | 1.27249200  |
| O  | 2.87231400  | 2.46605700  | -0.72311100 |
| S  | 5.85906700  | -0.50962400 | -0.30054200 |
| O  | 4.85000900  | 0.60170900  | -0.37489500 |
| O  | 4.52258200  | -2.15157300 | -0.36401000 |
| O  | 6.55045300  | -0.68245700 | -1.57942700 |
| O  | 3.14468100  | -0.69781800 | 1.62498900  |
| H  | -2.67197700 | -2.25296600 | 0.43258800  |
| H  | 0.89575100  | 0.57161200  | 3.04768200  |
| H  | -1.17960300 | 2.34042000  | 0.97004100  |
| Au | -2.88475600 | 0.04447300  | 2.63310400  |
| Cl | -1.85760500 | 2.08812900  | 3.14469600  |
| Cl | -3.97252000 | -1.98890300 | 2.18250900  |
| O  | 1.29542400  | 0.06125900  | 3.77403200  |
| H  | 2.01705600  | -0.39325400 | 3.31375800  |

**D-2**

45

|    |             |             |             |
|----|-------------|-------------|-------------|
| Mo | -3.15840100 | 0.08679600  | -0.35137800 |
| O  | -4.60807700 | 0.02060200  | 0.51343600  |
| Mo | -2.24664300 | 2.40651800  | 0.22169100  |
| O  | -3.42056600 | 3.05204600  | 1.25054000  |
| Mo | -1.00244100 | -2.71929800 | -1.21821300 |
| O  | -1.15924100 | -4.33767400 | -0.73964600 |
| O  | -1.84630100 | 0.65273700  | 0.94051600  |
| O  | -3.12809400 | 1.73329800  | -1.36264500 |
| O  | 0.23796000  | -2.10622300 | 0.02785200  |
| O  | 0.36853500  | -2.67839200 | -2.45167200 |
| S  | -0.08452200 | 0.65871000  | -2.03680500 |
| O  | -1.21007600 | -0.36968100 | -1.64910600 |
| O  | -0.26884600 | 1.83661300  | -1.02711900 |
| S  | -4.06661000 | -2.24181100 | -2.53913700 |
| O  | -3.95844600 | -0.72836300 | -2.12711900 |
| O  | -2.45312600 | -2.66731300 | -2.51213200 |
| S  | -0.90530500 | 5.30858000  | -0.98243900 |
| O  | -1.94496300 | 4.11159300  | -0.93597600 |
| O  | -4.41776600 | -2.26376100 | -3.98834400 |
| O  | -0.96873000 | 6.04405600  | 0.32679300  |
| O  | -2.48738000 | -1.89415100 | 0.01701000  |
| O  | -0.49195600 | 2.92510600  | 1.30175300  |
| O  | 1.23955800  | -0.02994000 | -1.56584100 |
| O  | 0.51441400  | 4.51246700  | -1.00496800 |
| Mo | 3.11172500  | 0.83943400  | -0.26802600 |
| O  | 4.54207000  | 1.21274300  | 0.56100900  |
| Mo | 1.28964500  | 3.12733100  | 0.23360500  |
| O  | 2.14886300  | 4.14633300  | 1.26200100  |
| Mo | 1.87931300  | -2.21819700 | -1.16440700 |
| O  | 2.47584100  | -3.71987400 | -0.70274400 |
| O  | 1.78656300  | 1.30093700  | 0.94318900  |
| O  | 2.56918300  | 2.48810000  | -1.10907600 |
| S  | 4.45270800  | -0.91592800 | -2.74688900 |
| O  | 3.96019000  | 0.48208000  | -2.12849000 |
| O  | 3.07171300  | -1.79854900 | -2.72246000 |
| O  | 4.68628500  | -0.64588000 | -4.19730300 |
| O  | 3.02765000  | -1.02342400 | -0.08256200 |
| H  | -2.29443400 | -2.03940000 | 0.96659500  |
| H  | 3.77445400  | -1.81462100 | 1.41743400  |
| H  | -0.35634500 | 2.18648900  | 1.91411100  |
| Au | -0.06665400 | -1.49832900 | 3.50800700  |
| Cl | 1.93487200  | -0.49207200 | 4.16582600  |
| Cl | -2.10235700 | -2.55851700 | 3.04340600  |
| O  | 4.05096300  | -2.16500300 | 2.28267500  |
| H  | 3.44481700  | -1.72972300 | 2.90267400  |
